# Supplementary material for: The Impact of Future Sea-Level Rise on Low-Lying Subsiding Coasts: A Case Study of Tavoliere Delle Puglie (Southern Italy)
Source: MDPI journal article supplement (doi:10.3390/rs14194936), 2022-10-02
Supplement: s1 [file s1]

Archive with 1 entries (1 files):
- remotesensing-1897040-supplementary.pdf
